# Phenome-wide burden of copy number variation in UK Biobank

Matthew Aguirre<sup>1,2</sup>, Manuel Rivas<sup>1</sup>, James Priest<sup>2,3</sup>

## **Abstract:**

Copy number variations (CNV) represent a significant proportion of the genetic differences between individuals and many CNVs associate causally with syndromic disease and clinical outcomes. Here, we characterize the landscape of copy number variation and their phenome-wide effects in a sample of 472,228 array-genotyped individuals from the UK Biobank. In addition to population-level selection effects against genic loci conferring high-mortality, we describe genetic burden from syndromic and previously uncharacterized CNV loci across nearly 2,000 quantitative and dichotomous traits, with separate analyses for common and rare classes of variation. Specifically, we highlight the effects of CNVs at two well-known syndromic loci *16p11.2* and *22q11.2*, as well as novel associations at *9p23*, in the context of acute coronary artery disease and high body mass index. Our data constitute a deeply contextualized portrait of population-wide burden of copy number variation, as well as a series of known and novel dosage-mediated genic associations across the medical phenome.

## **Introduction:**

Copy number variants (CNV) are a class of structural variation often defined as large deletions or duplications of at least 1 kilobase (kb) of genomic sequence. CNVs exhibit substantial variability in both size and frequency in the population and have been implicated across a variety of common and rare health outcomes<sup>1</sup>. Regional deletion and duplication syndromes have also been described at many loci, clustering near microsatellite repeats or areas of segmental duplication which may potentiate non-allelic homologous recombination<sup>2</sup>. For example, CNV-based architectures for neuropsychiatric (e.g. autism spectrum disorder), developmental (e.g. *16p11.2*)<sup>3,4</sup>, and syndromic cardiac disease (e.g. *22q11.2*)<sup>5</sup> phenotypes have been well established.

Despite a growing body research on CNV-related syndromes and disease etiologies, large-scale studies of CNV effects have been limited by their rarity in the general population. However, burden testing methods which address this rarity by pooling observed variation across gene regions have yielded reproducible associations in the context of congenital heart disease and various neurocognitive outcomes<sup>6,7</sup>. Moreover, as studies which include either microarray or NGS-based genotype data have grown in size and scope, it has become possible to describe the distribution of CNVs at kilobase-level resolution in the general population<sup>8,9</sup>. Furthermore, the aggregation of richly annotated phenotype data in biobanks has diversified the set of phenotypes available for well-powered association studies, and allows for more precise characterization of syndromic CNV-associated disease<sup>10,11,12</sup>.

---

<sup>1</sup>Department of Biomedical Data Science, School of Medicine, Stanford University, Stanford, CA, USA.

<sup>2</sup>Department of Pediatrics, School of Medicine, Stanford University, Stanford, CA, USA.

<sup>3</sup>Stanford Cardiovascular Institute, Stanford University, Stanford, CA, USA.

41

42 We here describe the landscape of copy number variation and their associations with 1,937  
43 phenotypes in a cohort of 472,228 participants from the UK Biobank<sup>13</sup>. We replicate well-  
44 established syndromic effects of common CNVs — namely *22q11.2* deletion (DiGeorge)  
45 syndrome and two variants of *16p11.2* deletion syndrome — and highlight known and novel  
46 associations for body mass index (BMI), acute coronary artery disease (CAD), and related  
47 adipose and cardiovascular phenotypes. Summary statistics from traditional genome-wide  
48 associations for common CNVs, as well as from gene-level aggregate burden tests of rare  
49 variants across all phenotypes are available for download on the Global Biobank Engine<sup>14</sup>.

50

## 51 **Results:**

52

### 53 **Landscape of common and rare CNVs in a large volunteer cohort**

54

55 To call copy number variants in UK Biobank, we apply PennCNV<sup>15</sup> separately within each  
56 genotyping batch, resulting in 278,455 unique CNVs among 472,228 individuals after sample  
57 quality control. We also observe heavy-tailed distributions in size and allele count of CNVs, with  
58 average CNV length ~226kb and the majority of called variants singleton in the cohort (Figure  
59 1a,b). This translates to notable burden of variation for nearly all individuals, with 439,464  
60 (93.1%) of the individuals possessing at least one CNV detectable at kilobase- resolution  
61 (Figure 1c,d). Among individuals with at least one CNV, we estimate an average burden of 5.5  
62 variants covering >200kb of genomic sequence (median 3 variants affecting ~100kb, Figure  
63 1c,d). While in-line with previous reports<sup>8</sup>, these estimates of individual-level burden are likely  
64 conservative, as regions where array markers are sparse or missing limit the accuracy of variant  
65 calling. Furthermore, we are unable to call smaller (<1kb) variants due to inconsistent marker  
66 density across all chromosomal regions on the Axiom and BiLEVE UK Biobank genotyping  
67 arrays. This limitation is visible in the histogram of called CNV lengths (Figure 1a); we call  
68 substantially fewer variants on the order of hundreds of base-pairs than on the order of  
69 thousands.

70

71 We also observe a highly non-uniform burden of variation across genomic position, with  
72 breakpoints most common near the ends of chromosomes, and at known regions of segmental  
73 duplication (Figure 1e). Among them are *1p36*, *8q24.3*, *9q34.3*, and *19q13*, all of which have  
74 associated microdeletion syndromes causing developmental delay with uniquely characteristic  
75 growth patterns<sup>16–19</sup>. Other CNV-hotspots like *6p21.33*, which contains the major  
76 histocompatibility complex protein gene family, may be influenced by high marker density (in  
77 this case for HLA allelotyping) in addition to these biological features which underlie structural  
78 mutagenesis. However, these loci do not categorically correspond to areas where structural  
79 variation is commonly observed in the population (Figure S1). For example, *1p36* and *19q13* are  
80 also the respective sites of common CNVs overlapping *RHD* and *FUT2* (Rhesus and Lewis  
81 blood groups), but there are no such common variants within the telomeric *16p13* cytoband.

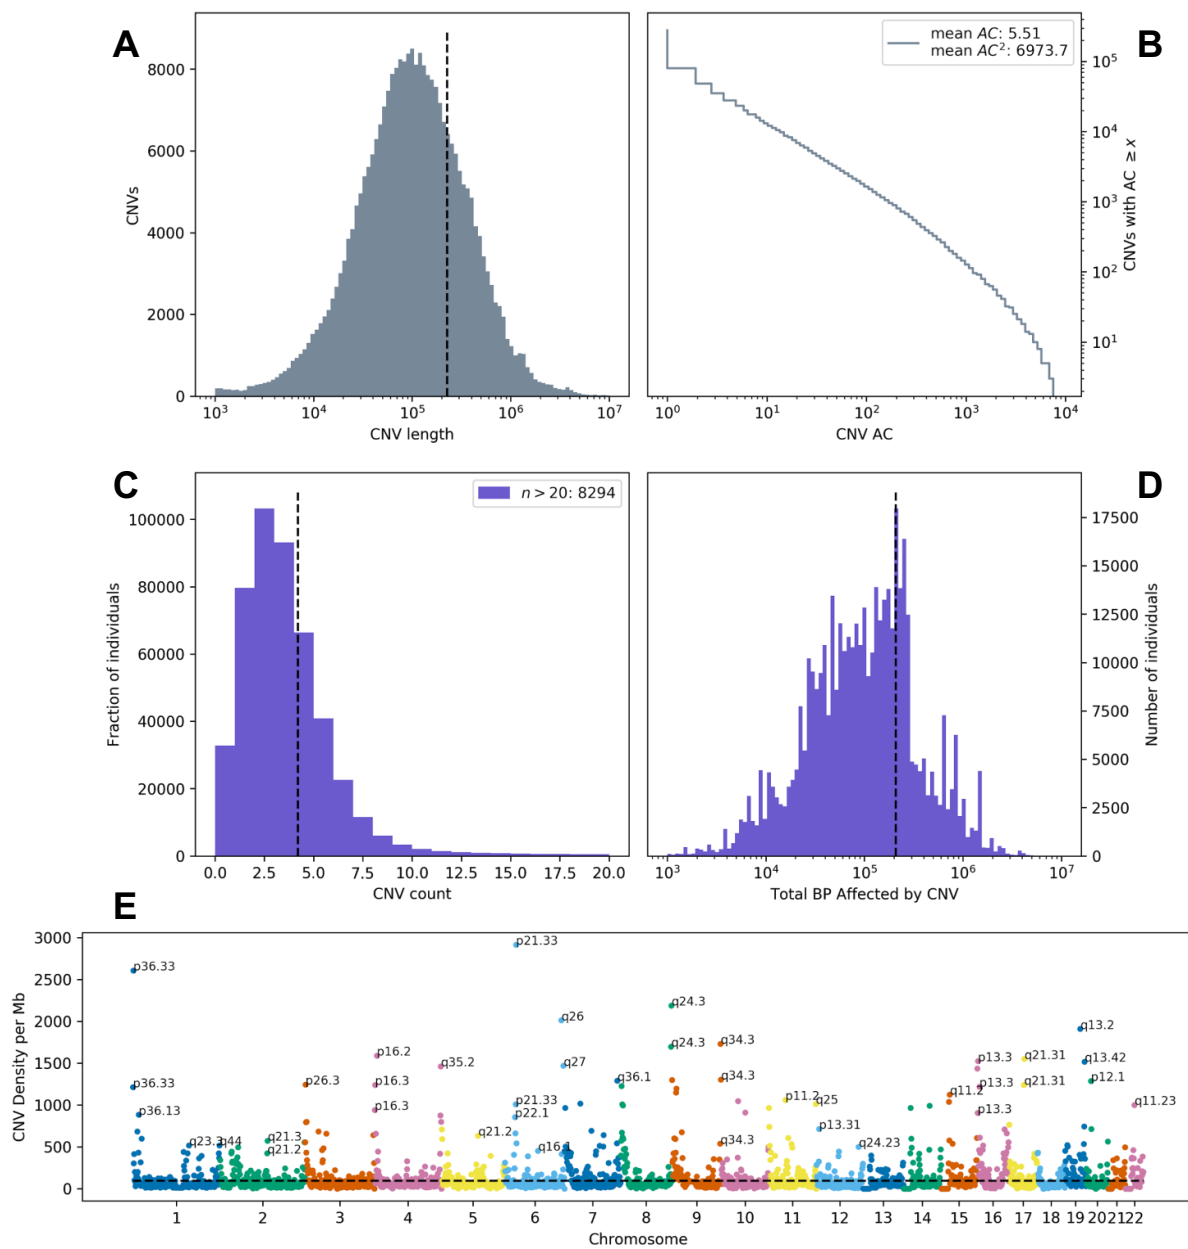

82

**Figure 1: Burden and distribution of copy number variation in UK Biobank. (A)** Log-scale histogram of CNV lengths. Mean length (dashed line) is 226.5kb. **(B)** Cumulative density of CNV allele count (AC), displayed in log-log axes. Average AC is 5.5, but average frequency as experienced by the population (weighted by count, hence  $AC^2$ ) is  $\sim 1.6\%$ . **(C)** Histogram of CNV counts and **(D)** log-scale base-pairs affected by CNV per individual. Sample-level burden is heavy-tailed, with the average individual carrying 4.2 variants (dashed line), affecting mean  $\sim 207.6$ kb of genomic sequence. **(E)** Genome-wide density of CNV, defined as the number of unique CNVs overlapping 10 megabase (Mb) windows tiling each chromosome. Hotspots of structural variation are labeled by cytogenic band.

83

84

## 85 Survivorship bias due to genetic selection against early-onset diseases

86  
87 We estimate gene-level intolerance to structural variation by adapting a method for estimating  
88 regional selective constraint<sup>8</sup>. Relative to the general population, the volunteers within the UK  
89 Biobank are described to have a “healthy-cohort” enrollment bias<sup>20</sup> and were enrolled between  
90 the ages of 40 to 69, which informs our findings. Within the tail of positive constraint z-scores,  
91 which indicate the strongest intolerance to structural variation, we observe enrichment for genes  
92 which cause early onset diseases, particularly cancer. Among the top fifteen constrained genes  
93 (Table 1) are *BRCA1* and *BRCA2*, which are associated with early-onset breast cancer<sup>21,22</sup>;  
94 *MLH1*, *MSH2*, *MSH6*, which cause early onset colorectal cancer (Lynch syndrome)<sup>23–25</sup>; and  
95 *ATM* and *APC*, which are involved with mismatch repair cancers<sup>26,27</sup>.

|           | Constraint z | CNV pLI |
|-----------|--------------|---------|
| BRCA2     | 3.262        | 0.9905  |
| BRCA1     | 2.470        | 0.9830  |
| APC       | 1.997        | 0.9421  |
| ATM       | 1.196        | 0.9886  |
| MSH2      | 1.192        | 0.9875  |
| MLH1      | 1.176        | 0.9959  |
| MSH6      | 0.918        | 0.9928  |
| SBDS      | 0.875        | 0.9739  |
| RB1       | 0.872        | 0.9552  |
| SPATA31D1 | 0.869        | 0.9979  |
| CYP3A4    | 0.863        | 0.9979  |
| OTOP1     | 0.848        | 0.9930  |
| PABPC3    | 0.847        | 0.9923  |
| KRT16     | 0.844        | 0.9979  |
| ZNF302    | 0.844        | 0.9979  |

**Table 1: (Left)** 15 genes most intolerant to copy number variation. Columns are gene label, constraint z-score, and probability of CNV intolerance (pLI, see Methods for definitions).

**Table 2: (Below):** 15 pathways most enriched for constrained genes (t-test, gene set members versus all others). Columns are GO pathway ID/name, change in z-score between set and non- set members, indicating mean strength of selective effect in the pathway, and *p*-value.

|            | Pathway                                                    | $\Delta z$ | P                      |
|------------|------------------------------------------------------------|------------|------------------------|
| GO:0000137 | Golgi cis cisterna                                         | 0.42       | $1.16 \times 10^{-31}$ |
| GO:0045095 | keratin filament                                           | 0.26       | $7.29 \times 10^{-31}$ |
| GO:0052697 | xenobiotic glucuronidation                                 | 0.49       | $1.03 \times 10^{-21}$ |
| GO:0005515 | protein binding                                            | 0.07       | $1.24 \times 10^{-21}$ |
| GO:0031424 | keratinization                                             | 0.18       | $1.51 \times 10^{-21}$ |
| GO:0000800 | lateral element                                            | 0.46       | $3.46 \times 10^{-21}$ |
| GO:0008194 | UDP-glycosyltransferase activity                           | 0.36       | $6.13 \times 10^{-21}$ |
| GO:0015020 | glucuronosyltransferase activity                           | 0.35       | $1.32 \times 10^{-17}$ |
| GO:0008202 | steroid metabolic process                                  | 0.28       | $9.31 \times 10^{-17}$ |
| GO:0005132 | type I interferon receptor binding                         | 0.35       | $1.78 \times 10^{-16}$ |
| GO:0008274 | gamma-tubulin ring complex                                 | 0.39       | $2.66 \times 10^{-16}$ |
| GO:0002323 | natural killer cell activation involved in immune response | 0.36       | $1.54 \times 10^{-14}$ |
| GO:0005131 | growth hormone receptor binding                            | 0.54       | $4.33 \times 10^{-14}$ |
| GO:0052696 | flavonoid glucuronidation                                  | 0.45       | $5.40 \times 10^{-14}$ |
| GO:0042954 | lipoprotein transporter activity                           | 0.40       | $5.78 \times 10^{-14}$ |

96  
97  
98 Selections from the most highly constrained pathways from Gene Ontology Consortium<sup>28</sup>  
99 resources (Table 2) also suggest strong intolerance to CNV for genes involved with core  
100 biological processes like protein binding, cellular structural integrity (keratinization),  
101 development (growth hormone receptor binding), and immune regulation (natural killer cell  
102 activation). Similar results at the gene- and pathway-level are observed for deletion-specific

103 constraint (Table S1,S2), whereas duplication-specific analysis suggests autoimmune-related  
104 genes and pathways are most strongly intolerant to dosage effects (Table S1,S2). These results  
105 indicate strong selective effects occurring prior to enrollment in the UK Biobank during childhood  
106 and early adulthood against loss of function variation in core developmental, metabolic, and  
107 tumor-suppressing genes, and against dosage-altering variation in immune-related genes.

108

### 109 **Association testing identifies CNVs at novel and syndromic loci**

110

111 We compute genome-wide associations across 1,893 phenotypes for 8,274 common CNVs  
112 observed at 0.005% allele frequency (1 in 20,000) in our cohort, using regression as  
113 implemented in the analysis software PLINK<sup>29</sup>. We also perform L1-regularized regression for  
114 rare-variant burden tests, pooled by gene. For these tests, we measure the net effect of rare  
115 CNVs (AF < 0.1%) overlapping within 10kb of the gene region as defined by HGNC<sup>30</sup> for 7,614  
116 protein coding genes with at least 5 individuals affected by such a variant. A complete list of  
117 phenotypes analyzed is available in Table S3. Here, we describe representative results for one  
118 common disease and one quantitative measure with established genetic risk factors and large  
119 sample sizes in UK Biobank: acute coronary artery disease (CAD) and body mass index (BMI).

120

121 For Acute CAD, we identify one statistically significant ( $p < 6 \times 10^{-6}$ ) association after Bonferroni  
122 correction for the common CNV GWAS: an intergenic deletion at chromosome 9p23. Intergenic  
123 variants at the 9p21 locus have been implicated in previous association studies of blood-based  
124 biomarkers relevant to cardiac outcomes, specifically, decreases in hematocrit and hemoglobin  
125 concentration<sup>31</sup>, as well as carotid plaque burden<sup>32</sup>. A recent meta-analysis<sup>33</sup> using data from  
126 UK Biobank and CARDIoGRAMplusC4D identified a lead variant in the vicinity of this locus  
127 (rs2891168) associated with 6% unit increase in risk for similarly defined coronary artery  
128 disease. However, the CNV we here identify confers an estimated 12.4-fold increased risk  
129 (95%CI: 4.3-35.9,  $p=3.6 \times 10^{-6}$ ) and is at least 2Mb distant from the nearest SNPs (rs10961206)  
130 at genome-wide significance near the 9p21/9p23 locus in the meta-analysis. This and the  
131 absence of linkage between the 9p23 CNVs and rs10961206 ( $r = 0.013$ ) are suggestive of  
132 independent effects.

133

134 Gene-level burden testing of rare CNVs in individuals with CAD implicates *LDLRAD3*, a member  
135 of the low density lipoprotein (LDL) receptor family. CNVs called in this gene are predominantly  
136 deletions affecting the coding sequence — in aggregate ( $n=27$ ), these variants confer an  
137 estimated 10-fold increase in risk of Acute CAD (95% CI: 3.9-25.6,  $p=1.4 \times 10^{-6}$ ). Though the role  
138 of lipoprotein receptors in cholesterol metabolism is a well established mechanism of risk for  
139 cardiovascular disease, *LDLRAD3* is not known to participate in cholesterol metabolism. It is,  
140 however, a receptor widely expressed throughout adult tissues which may participate in  
141 proteolysis in the central nervous system<sup>34,35</sup>. We therefore sought to replicate these findings  
142 using two-sample mendelian randomization<sup>36</sup> on expression quantitative trait loci (eQTLs) from  
143 CAD summary statistics from a CARDIoGRAMplusC4D meta-analysis<sup>37</sup>. We identify a nominally  
144 significant protective effect between an eQTL increasing expression of *LDLRAD3* and CAD  
145 (OR=0.85 [95%CI: 0.62-0.97],  $p=0.012$ ), the direction of which is consistent with a dosage  
146 model of *LDLRAD3*-mediated risk for CAD.



147

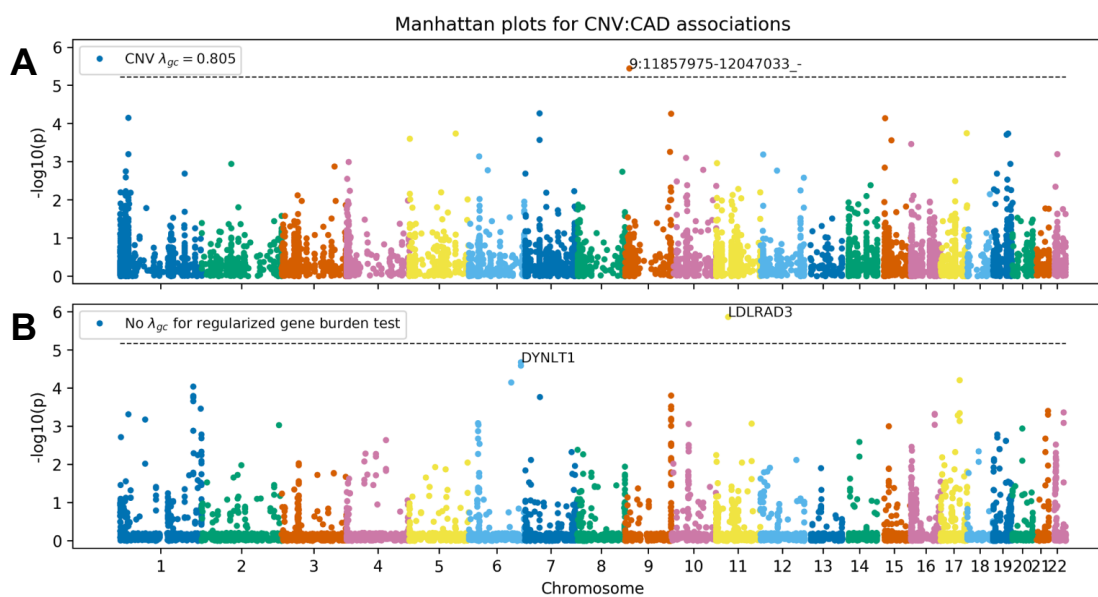

148

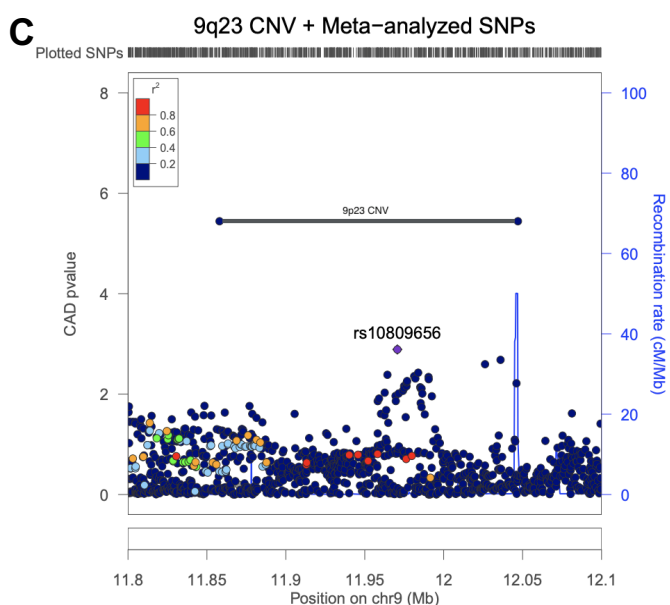

**Figure 2: Genome-wide CNV associations for acute coronary artery disease (CAD).** Manhattan plots for (A) genome-wide association of common copy number variants, and (B) genome-wide burden test of rare variants. (C) LocusZoom<sup>38</sup> of 9p23 CNV and summary statistics from meta-analysis of CAD<sup>33</sup> colored by marker LD with lead regional GWAS SNP (rs10809656) in HapMap<sup>39</sup> European samples.

149

150 We also find two significant associations for BMI, both deletions at chromosome *16p11.2*, a  
 151 locus implicated in syndromic early onset obesity and developmental delay. Each of these  
 152 CNVs appears to correspond to a distinct form of *16p11.2* deletion syndrome. The smaller  
 153  $\sim 220\text{kb}$  deletion ( $\beta = 4.5 \text{ kg/m}^2$  [95%CI: 2.7-6.3  $\text{kg/m}^2$ ],  $p = 1.8 \times 10^{-6}$ , AC=35) has been  
 154 associated with early onset obesity, and spans *ATXN2L*, *TUFM*, *SH2B1*, *ATP2A1*, *RABEP2*,  
 155 *CD19*, *NFATC2IP*, *SPNS1*, and *LAT*, with *SH2B1* the suspected causal obesity gene<sup>3</sup>. Obesity  
 156 is also a phenotypic consequence of a larger  $\sim 593\text{kb}$  deletion ( $\beta = 7.8 \text{ kg/m}^2$  [95%CI: 6.2-9.4  
 157  $\text{kg/m}^2$ ],  $p = 5.0 \times 10^{-23}$ , AC=58), which is further associated with neurodevelopmental delay and  
 158 related conditions<sup>4</sup>. However, this deletion spans a wholly distinct set of genes which are  
 159 suspected to play complex dosage-dependent roles in the phenotypic consequences of the

160 syndrome<sup>40</sup>. As both subtypes of *16p11.2* deletion syndrome may present in early childhood, it  
 161 is noteworthy that the effect we measure on BMI is in a cohort comprised entirely of older  
 162 individuals, indicating burden of adult disease associated with the CNV locus.  
 163

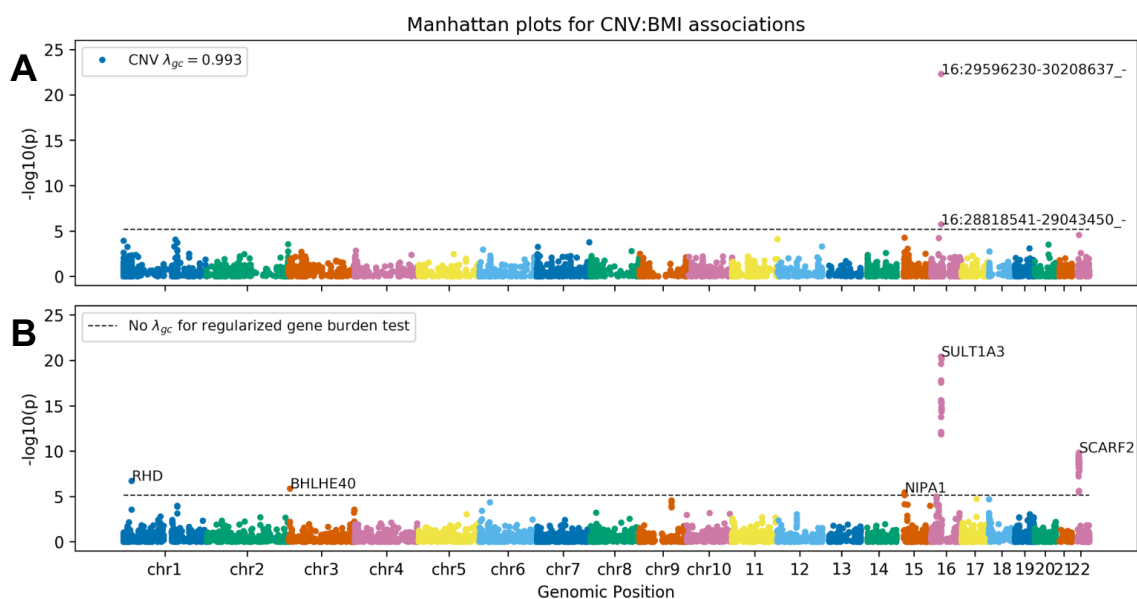

164

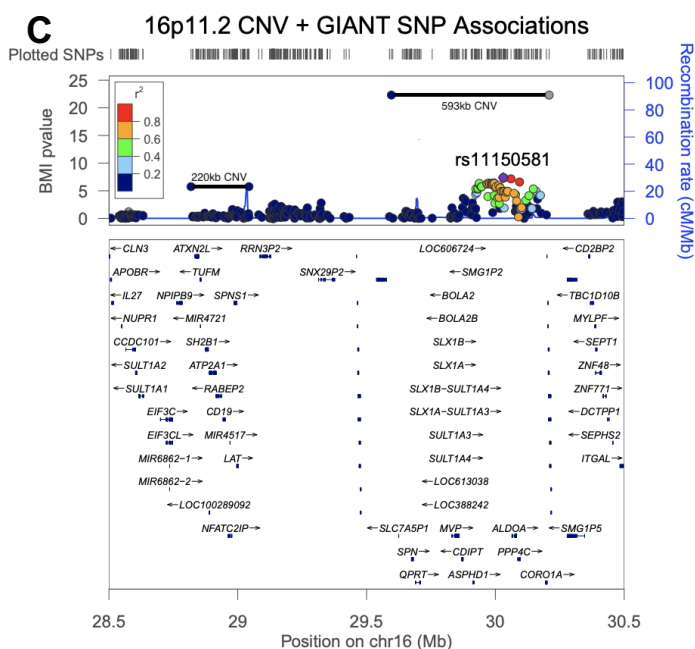

**Figure 3: Genome-wide CNV associations for body mass index (BMI).** Manhattan plots for (A) genome-wide association of common copy number variants, and (B) genome-wide burden test of rare variants. (C) LocusZoom of *16p11.2* CNVs and BMI summary statistics from the GIANT study<sup>41</sup>, colored by marker LD with the lead SNP at the locus (rs11150581), computed from HapMap European samples.

165 After controlling for multiple comparisons, burden testing for BMI identifies a group of genes at  
 166 chromosome *22q11.2* and recapitulates the list of genes affected by each of the *16p11.2*  
 167 deletions. Variation at the *22q11.2* locus also constitutes one of the first named microdeletion  
 168 syndromes, DiGeorge syndrome, which has variable phenotypic consequences including  
 169 craniofacial dysmorphisms and conotruncal congenital heart disease, along with increased risk  
 170 for an adverse cardiovascular outcomes and neuropsychiatric disease later in life<sup>5</sup>. Among  
 171

172 individuals affected with 22q11.2 deletion syndrome obesity is a recognized manifestation of  
 173 disease<sup>42</sup>, and we estimate a 0.3-0.4 point increase in BMI for genic CNVs near 22q11.2. as  
 174 well as 0.55-0.7 for genic CNV at 16p11.2. The presence of these associations in a large  
 175 volunteer cohort offers further evidence that syndromic alleles may contribute to the risk of  
 176 common diseases in the general population.  
 177

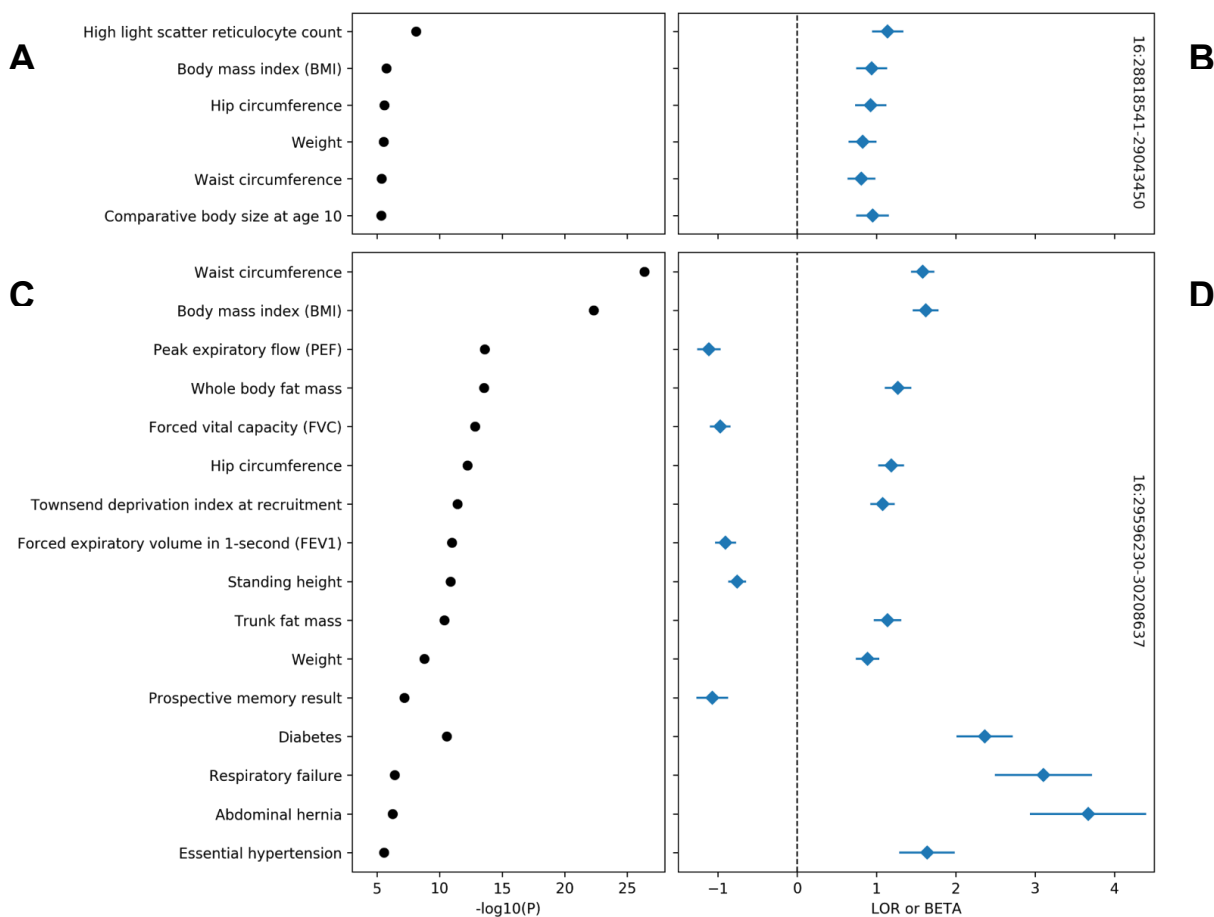

**Figure 4: PheWAS of 16p11.2 CNVs.** Selected genome-wide significant ( $p < 6 \times 10^{-6}$ ) associations for 220kb (top panels) and 593kb (bottom panels) 16p11.2 CNVs. Traits are grouped by type (binary/quantitative) then sorted by  $p$ -value (left panels). Log-odds ratio and standardized betas (right panels) align with trait names on the y-axis, with the horizontal dashed line separating positive and negative direction of association.

179  
 180 Phenome-wide associations for each of the CNVs at 16p11.2 further highlight changes in  
 181 biomarkers, biomeasures, and increased risk of common disease, consistent with high BMI over  
 182 the course of a lifetime (Figure 4). Genome-wide significant phenotypes for the 220kb CNV  
 183 recapitulate the established syndromic effects from early onset obesity. We observe significant  
 184 increases, on the order of one standard deviation, in weight, BMI, hip and waist circumference,  
 185 reticulocyte count, and comparative body size at age 10 for these individuals. The larger 593kb  
 186 CNV associates with similar measures of body size and fat, as well as hypertension, diabetes,  
 187 and abdominal hernia. These results are also indicative of effects due to developmental delay;



188 namely, decreased measures of memory, higher Townsend deprivation, and lower lung capacity  
189 (FEV, FVC) with higher associated risk of respiratory failure. Taken together these results  
190 highlight the variable expressivity of CNV-related disease, as well as its long-term effects across  
191 the medical phenome.

192

## 193 **Discussion:**

194

195 In calling copy number variants and performing genetic association studies at scale from a large  
196 cohort of array-genotyped individuals with richly annotated phenotype data, we provide a  
197 portrait of the phenome-wide burden of genomic copy number variation. Our estimates of the  
198 individual-level burden of CNV and population-wide allele frequencies are consistent with  
199 previous reports, the deep phenotypic information available in the UK Biobank permits more  
200 finely tuned measures of the genic intolerance to CNV which include estimates of variation  
201 absent from our cohort of predominantly healthy, middle-aged individuals. We consider both  
202 rare and common CNVs in our association studies and identify effects of previously known  
203 (*22q11.2*, *16p11.2*) syndromes and potentially novel (*9p23*) loci which have not yet been  
204 characterized or associated with disease.

205

206 Our study has significant limitations which inform our analysis. While arrays are an inexpensive  
207 way to genotype large cohorts, permitting straightforward algorithms to infer the presence of  
208 structural variation, the resulting CNV calls are limited by the density and placement of markers  
209 across chromosomes. For UK Biobank genotyping arrays in particular, there are large portions  
210 of genomic sequence with low marker density (in particular near centromeric regions) which  
211 bias our resulting genotype calls away from such regions. Array-derived CNV calls also suffer  
212 from limitations, in their inability to differentiate other structural events like inversions or  
213 translocations, or to determine breakpoint position at base-pair resolution. Complicating these  
214 barriers is the fact that our sample was genotyped on two distinct arrays, which may cause  
215 identical CNVs to present with different breakpoints across individuals in the call set. Our choice  
216 to present gene-level burden tests which include the vast majority of variants included in our  
217 CNV GWAS was informed by this realization.

218

219 Our associations are also heavily impacted by a known “healthy-cohort” bias, which results in  
220 null results for several phenotypes with known genetic contributions; notably, there are no hits in  
221 our burden tests for cancers other than leukemia and lymphomas. With this in mind, our  
222 constraint scores constitute a sobering observation of genetic survivorship bias. Estimates of  
223 gene-level intolerance to structural variation are derived from people who did not enroll in UK  
224 Biobank; the absence of individuals who were not healthy enough to participate or did not  
225 survive until age 40 constitutes an enrollment bias against severe early-onset disease. We take  
226 this opportunity to honor these non-participating individuals and their implicit contribution to our  
227 understanding of genetic disease. The observation of selection bias colors the interpretation of  
228 genetic findings from UK Biobank in general, as the cohort is relatively depleted of disease of  
229 early-onset morbidity and mortality and any genetic variation associated with these diseases will  
230 likewise be difficult to detect. While UK Biobank is unprecedented in size, scope, and scientific

231 yield, our data illustrate that the anticipated findings from the proliferation of large biobank  
232 studies around the world will be influenced by implicit and explicit barriers to participation.

233  
234 Despite selection against high-penetrance alleles causing early-onset disease, we detect a  
235 novel and strong association for coronary artery disease at *LDLRAD3*. While this locus has prior  
236 putative association with bone mineral density<sup>43</sup>, existing large-scale GWAS do not detect a  
237 strong association with coronary artery disease or established cardiometabolic risk-factors.  
238 However, the absence of gene level intolerance to truncating and missense variation in  
239 *LDLRAD3* does not suggest a compelling rationale for important biological function or role in  
240 disease. In our study, CNVs at this locus are associated with some established cardiometabolic  
241 risk factors, such as diabetes onset, smoking status, and arterial stiffness, but not obesity or  
242 other fat-related phenotypes (Figure S6). Consistent with our findings that a decrease in  
243 *LDLRAD3* dosage increases the risk of disease, a strong eQTL increasing *LDLRAD3*  
244 expression decreases the risk of disease when used as an instrument in a two-sample  
245 mendelian randomization in a large-scale study of coronary artery disease. Thus, our findings of  
246 an mRNA dosage effect are replicated at the gene level. These results highlight the utility of  
247 analyzing genic CNV which, when directly impacting mRNA dosage, offer a more easily  
248 interpretable mechanism distinct from alterations of protein structure or small changes in  
249 transcriptional regulation.

250  
251 The observation of variation at the *16p11.2* and *22q11.2* loci sheds further light on the  
252 penetrance of syndromic loci in the general population. The *16p11.2* recurrent microdeletion  
253 syndrome was first described in individuals with autism and neuropsychiatric disease and may  
254 include seizures, brain and other anatomic abnormalities. Even accounting for the enrollment  
255 bias inherent to the UK Biobank our PheWAS detects a modest relationship to neurocognitive  
256 measurements via secondary markers of intellectual differences such as prospective memory  
257 for one variant at this locus. People carrying variation at the *22q11.2* locus within the general  
258 population are known to be at increased risk of neuropsychiatric diseases<sup>44</sup> for which variable  
259 phenotypic penetrance is well recognized<sup>345</sup>. To wit, individuals with genetic variation at both  
260 syndromic loci were by and large sufficiently healthy and capable of volunteering to participate  
261 in the Biobank. Our findings support a growing recognition that the penetrance and effect sizes  
262 of syndromic alleles will likely require revision in the context of broad population-based surveys  
263 of rare genetic variation<sup>46,47</sup>.

264  
265 Our findings add to the growing body of literature measuring global burden of structural variation  
266 across healthy and diseased individuals. Our estimates of the effects of common CNV suggest  
267 a notable role of structural variation in population-wide burden of common disease, and suggest  
268 genomic loci where novel CNV-derived syndromic disease may exist. For rare variants, our data  
269 offer broad phenotypic characterization of the effects of gene-specific knockouts, which may  
270 inform development of pharmacological and genetic therapies. While the functional  
271 consequence and pathogenicity of missense, synonymous, and noncoding single nucleotide  
272 variation within a gene may be difficult to classify, the mechanism of most genic CNV are clear:  
273 a dosage effect upon mRNA transcription. This population-scale catalog of variation and the  
274 described associations with a multiplicity of diseases should be of immediate use by genetic

275 clinicians in classification of novel and rare CNV detected in clinical testing. Full support for  
276 gene- and variant-level browsing is forthcoming in a future version of the Global Biobank Engine  
277 ([biobankengine.stanford.edu](http://biobankengine.stanford.edu)). In the interim, summary statistics from association studies  
278 described here, as well as for all phenotypes present on the engine, are freely available for  
279 download on the site. We hope that these data will be leveraged to empower future analyses of  
280 the phenome-wide effects of structural variation and gene-level dosage effects.

281

282

283

#### 284 Acknowledgements:

285

286 This research has been conducted using the UK Biobank Resource under application numbers  
287 24983, 16698, 13721, and 15860. We thank all the participants in the study. The primary and  
288 processed data used to generate the analyses presented here are available in the UK Biobank  
289 access management system (<https://amsportal.ukbiobank.ac.uk/>) for application 24983,  
290 "Generating effective therapeutic hypotheses from genomic and hospital linkage data"  
291 (<http://www.ukbiobank.ac.uk/wp-content/uploads/2017/06/24983-Dr-Manuel-Rivas.pdf>), and the  
292 results are displayed in the Global Biobank Engine (<https://biobankengine.stanford.edu>).

293

294 M.A.R. is supported by Stanford University and a National Institute of Health center for Multi-  
295 and Trans-ethnic Mapping of Mendelian and Complex Diseases grant (5U01 HG009080). This  
296 work was supported by National Human Genome Research Institute (NHGRI) of the National  
297 Institutes of Health (NIH) under awards R01HG010140. The content is solely the responsibility  
298 of the authors and does not necessarily represent the official views of the National Institutes of  
299 Health.

## 300 Methods

301  
302 CNVs were called using PennCNV v1.0.4 on raw signal intensity data from each genotyping  
303 array. Phenotype data was derived from data-fields collected for UK Biobank corresponding to  
304 various body measurements, biomarkers, disease diagnoses and medical procedures from  
305 medical records, as well as a questionnaire about lifestyle and medical history. Summary-level  
306 data from all statistical tests described here, as well as more thorough documentation on  
307 phenotyping, will be available on the Global Biobank Engine<sup>14</sup> ([biobankengine.stanford.edu](http://biobankengine.stanford.edu)) and  
308 can be found in related publications<sup>48</sup>.

### 309 310 CNV calling in UK Biobank:

311  
312 Methods for genetic data acquisition and quality control as performed by the UK Biobank have  
313 been previously described<sup>13</sup>. In brief, two similar arrays were used for targeted genotyping  
314 within the study population: the UK BiLEVE Axiom Array ( $n=49,950$ ) by Affymetrix and the UK  
315 Biobank Axiom Array ( $n=438,427$ ), which was custom-designed by Applied Biosystems.  
316 Samples and array markers were subject to threshold-based filtration and quality control prior to  
317 public release. Specifically, markers were tested for discordance across control replicates,  
318 departures from Hardy-Weinberg equilibrium, as well as effects due to batch, plate, array, and  
319 sex; affected markers were set as missing in affected batches or removed. Similarly, samples  
320 were tested for missingness ( $>5\%$ ) and heterozygosity across a set of high-quality markers, but  
321 samples identified as low quality ( $n=968$ ) were not excluded. We also chose to include these  
322 samples in this analysis, considering that large structural variants may have been responsible  
323 for their poor quality with respect to metrics used for filtration.

324  
325 We used PennCNV v1.0.4<sup>15</sup> to call CNVs within each of the 106 genotyping batches from UK  
326 Biobank. We first estimate genomic runs of heterozygosity (RoH) for each sample using a  
327 previously developed pipeline in PLINK<sup>49,50</sup> using the `--homozyg` option. We then select  $n=100$   
328 samples with total RoH covering less than 20MB to train a hidden markov model (HMM) of copy  
329 state on each chromosome. HMM training was initialized with conditions optimized for  
330 Affymetrix arrays (`affygw6.hmm`), provided in PennCNV resources. We used the general calling  
331 mode, which performs likelihood-based testing for copy-number state ( $CN=0,1,2,3,4$ ) at each  
332 input marker using its log-normalized signal intensity and allele balance in a given sample. We  
333 also apply adjustment for GC content across sites using waviness factor correction<sup>51</sup>. After CNV  
334 calling, we exclude 1,360 samples with over 30 called CNVs from downstream analysis,  
335 resulting in a cohort of 472,228 individuals with 278,455 unique variants.

### 336 337 Gene-level constraint estimation:

338  
339 Regional selective constraint to CNV was estimated for all protein-coding genes, with genic  
340 CNV defined as any variant overlapping within 10kb of the HGNC gene region. We estimate a  
341 null model of structural mutation empirically, and model burden of genic CNV as a linear  
342 function of gene size, fraction of genic sequence covered by regions of segmental duplication as  
343 extracted from the UCSC Genome Browser<sup>52,53</sup>. We also account for biased observations due to

344 array genotyping by including the number of genic markers as a covariate. The formula for this  
345 null model can be written as:

346

$$347 \quad n_{cnv} = \beta_1 \cdot len(gene) + \beta_2 \cdot frac(segdup) + \beta_3 \cdot n_{markers} + \epsilon$$

348

349 From this model, we compute constraint z-scores for each gene using its negated standardized  
350 residual for each gene, winsorizing the negative tail at the lowest 5% of values. We also  
351 compute the probability of loss of function intolerance (pLI) as the non-normalized residual over  
352 the number of expected CNV, with negative values rounded to zero.

353

### 354 Genetic associations:

355

356 Variant-level associations in UK Biobank were estimated with PLINK v2.00a (5 Jan 2018). We  
357 used the --glm firth-fallback option for computation. This option is a hybrid algorithm for logistic  
358 regression which defaults to a standard regression solver for computation, falling back to Firth's  
359 regression (<https://cran.r-project.org/web/packages/logistf/index.html>) in cases where one of the  
360 cells of the 2x2 contingency table is zero, or where the traditional method fails to converge in a  
361 pre-specified number of iterations. These analyses were performed in a subset of 337,538  
362 unrelated individuals of self-reported white British ancestry, and were controlled for age, sex,  
363 and 4 marker-based genomic principal components from the UK Biobank PCA calculation. To  
364 ensure adequate power for estimating genetic effects, we perform these tests on 8,274 CNVs  
365 observed at a frequency of 0.005% (1 in 20,000, or 18 individuals) in the whole sample of  
366 individuals with called CNVs.

367

368 Gene-level burden tests were conducted across all gene:phenotype pairs for genes with at least  
369 5 individuals with overlapping CNV. Genic burden was encoded as a binary variable which  
370 indicates whether an individual has a CNV which contains any overlap within 10,000 base pairs  
371 of the HGNC gene region. CNVs which overlapped several gene regions were used for analysis  
372 in each gene. We treat deletions and duplications identically, with the assumption that any CNV  
373 which overlaps a gene in this fashion will disrupt its normal function. Effects of genic CNV  
374 burden were estimated by linear and regularized logistic regression with the python package  
375 Statsmodels, respectively computed using the .fit() and .fit\_regularized() methods. We included  
376 the following as covariates in both models: age, sex, four marker-based genomic principal  
377 components from UK Biobank's PCA calculation, and the number and combined length of CNVs  
378 in each individual.

379

380 Two-sample mendelian randomization was performed via the MR Base web app using GWAS  
381 summary statistics for *LDLRAD3* expression QTLs from a CARDIoGRAMplusC4D meta-  
382 analysis<sup>37</sup>. We report Wald summary statistics from inverse-variance weighted Egger  
383 regression; these are the default analysis options for the web interface.

384

385



386  
387

### Supplementary Figures and Tables:

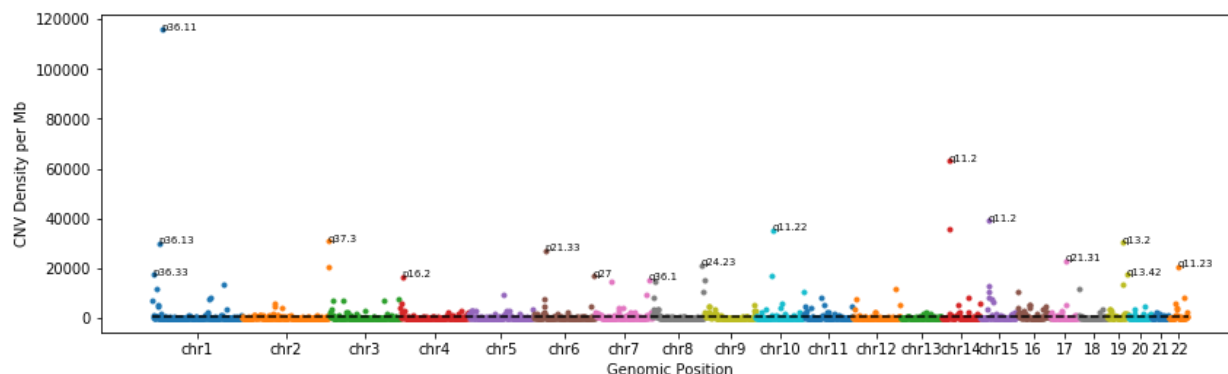

388

**Figure S1: CNV density weighted by allele count in UK Biobank.** Per-megabase genomic density of CNV, weighted by number of observations across all samples in UK Biobank. Variants are counted by whether the CNV has any overlap with 10 megabase (Mb) windows tiling each chromosome. Selected hotspots of structural variation are labeled by the region's corresponding cytogenetic band.

389  
390  
391

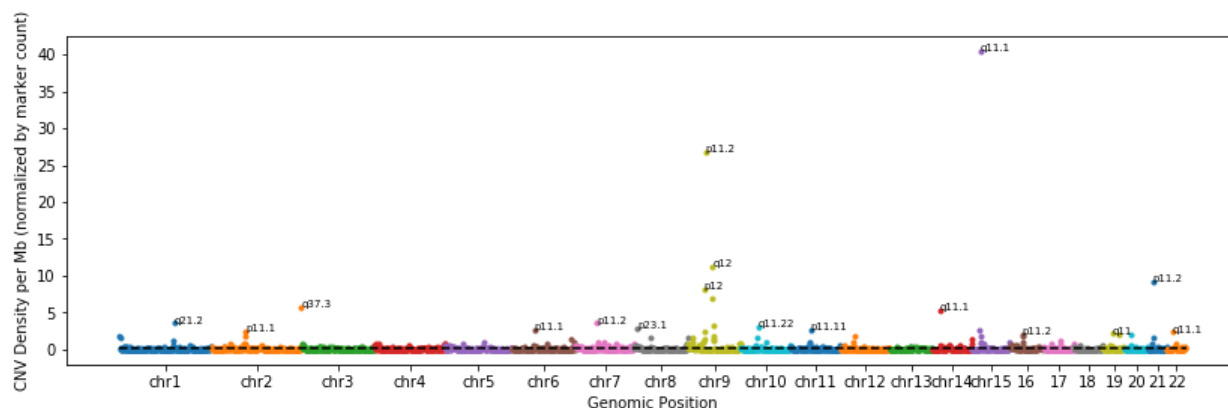

392

**Figure S2: CNV density normalized by array marker density in UK Biobank.** Variants are counted by whether the CNV has any overlap with 10 megabase (Mb) windows tiling each chromosome, then divided by the number of markers in the window. Regions with no array markers are defined to have density of zero. Selected hotspots of structural variation are labeled by the region's corresponding cytogenetic band.

393

|           | Deletion z |           | Duplication z |
|-----------|------------|-----------|---------------|
| BRCA2     | 2.974      | HLA-DRB1  | 0.581         |
| BRCA1     | 2.212      | FRG2B     | 0.581         |
| APC       | 1.857      | SPATA31D1 | 0.581         |
| ATM       | 1.104      | SLC35G6   | 0.580         |
| MSH2      | 1.087      | NAT8      | 0.580         |
| MLH1      | 1.072      | TUBB8     | 0.580         |
| MYH7      | 0.934      | CSH2      | 0.580         |
| PMS2      | 0.880      | ZNF302    | 0.580         |
| TTN       | 0.833      | CSHL1     | 0.580         |
| PVRL2     | 0.823      | GH1       | 0.580         |
| MSH6      | 0.821      | CGB2      | 0.579         |
| SBDS      | 0.816      | FAM215A   | 0.579         |
| CYP3A4    | 0.816      | OR4F17    | 0.579         |
| SPATA31D1 | 0.815      | CGB5      | 0.579         |
| OTOP1     | 0.809      | CGB7      | 0.579         |

394

**Table S1:** 15 genes most intolerant to overlapping deletion (left), and whole-gene duplication (right), with respective constraint z-scores.

395

396

| Deletion-intolerant Pathway |                                                  | $\Delta z$ | P                      |
|-----------------------------|--------------------------------------------------|------------|------------------------|
| GO:0045095                  | keratin filament                                 | 0.23       | $2.22 \times 10^{-28}$ |
| GO:0000137                  | Golgi cis cisterna                               | 0.36       | $2.10 \times 10^{-26}$ |
| GO:0052697                  | xenobiotic glucuronidation                       | 0.44       | $5.29 \times 10^{-20}$ |
| GO:0008194                  | UDP-glycosyltransferase activity                 | 0.32       | $4.79 \times 10^{-19}$ |
| GO:0005515                  | protein binding                                  | 0.05       | $1.19 \times 10^{-17}$ |
| GO:0000800                  | lateral element                                  | 0.39       | $1.36 \times 10^{-17}$ |
| GO:0031424                  | keratinization                                   | 0.15       | $1.33 \times 10^{-16}$ |
| GO:0015020                  | glucuronosyltransferase activity                 | 0.31       | $2.56 \times 10^{-16}$ |
| GO:0042954                  | lipoprotein transporter activity                 | 0.37       | $3.33 \times 10^{-14}$ |
| GO:0005131                  | growth hormone receptor binding                  | 0.50       | $3.48 \times 10^{-13}$ |
| GO:0008202                  | steroid metabolic process                        | 0.24       | $4.49 \times 10^{-13}$ |
| GO:0046703                  | natural killer cell lectin-like receptor binding | 0.39       | $7.08 \times 10^{-13}$ |
| GO:0008274                  | gamma-tubulin ring complex                       | 0.32       | $1.08 \times 10^{-12}$ |
| GO:0005132                  | type I interferon receptor binding               | 0.28       | $1.40 \times 10^{-12}$ |
| GO:0052696                  | flavonoid glucuronidation                        | 0.40       | $1.59 \times 10^{-12}$ |

397

398

| Duplication-intolerant Pathway |                                                                        | $\Delta z$ | P                      |
|--------------------------------|------------------------------------------------------------------------|------------|------------------------|
| GO:0000137                     | Golgi cis cisterna                                                     | 0.34       | $2.57 \times 10^{-46}$ |
| GO:0045095                     | keratin filament                                                       | 0.19       | $4.45 \times 10^{-34}$ |
| GO:0005515                     | protein binding                                                        | 0.05       | $1.56 \times 10^{-30}$ |
| GO:0031424                     | keratinization                                                         | 0.14       | $2.12 \times 10^{-23}$ |
| GO:0008202                     | steroid metabolic process                                              | 0.22       | $1.60 \times 10^{-22}$ |
| GO:0005132                     | type I interferon receptor binding                                     | 0.27       | $8.04 \times 10^{-20}$ |
| GO:0008194                     | UDP-glycosyltransferase activity                                       | 0.24       | $5.47 \times 10^{-19}$ |
| GO:0005801                     | cis-Golgi network                                                      | 0.17       | $6.16 \times 10^{-19}$ |
| GO:0046703                     | natural killer cell lectin-like receptor binding                       | 0.37       | $6.81 \times 10^{-19}$ |
| GO:0052697                     | xenobiotic glucuronidation                                             | 0.30       | $9.68 \times 10^{-18}$ |
| GO:0002323                     | natural killer cell activation involved in immune response             | 0.27       | $1.49 \times 10^{-17}$ |
| GO:0033141                     | positive regulation of peptidyl-serine phosphorylation of STAT protein | 0.24       | $7.73 \times 10^{-17}$ |
| GO:0006805                     | xenobiotic metabolic process                                           | 0.16       | $1.73 \times 10^{-15}$ |
| GO:0005131                     | growth hormone receptor binding                                        | 0.39       | $2.39 \times 10^{-15}$ |
| GO:0042271                     | susceptibility to natural killer cell mediated cytotoxicity            | 0.24       | $4.69 \times 10^{-15}$ |

399

**Table S2:** GO pathways most intolerant to overlapping deletion (top), and whole-gene duplication (bottom), with change in constraint z-scores and significance thereof (t-test) relative to other pathways.

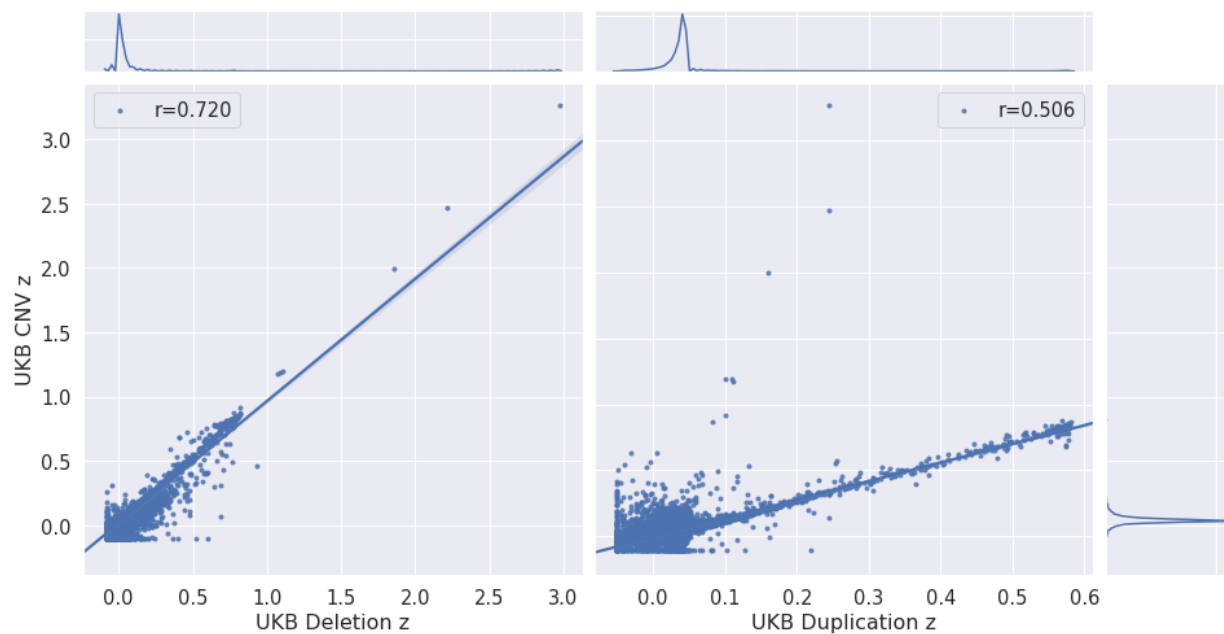

400

**Figure S3:** Correlation between intolerance measures for partial-gene deletion, whole-gene duplication, and CNV burden. The legend for each panel denotes correlation (Spearman's  $r$ ) between burden-constraint and each other measure. Kernel density estimates for each distribution of constraint scores are in the panels opposite their corresponding axis labels.

401

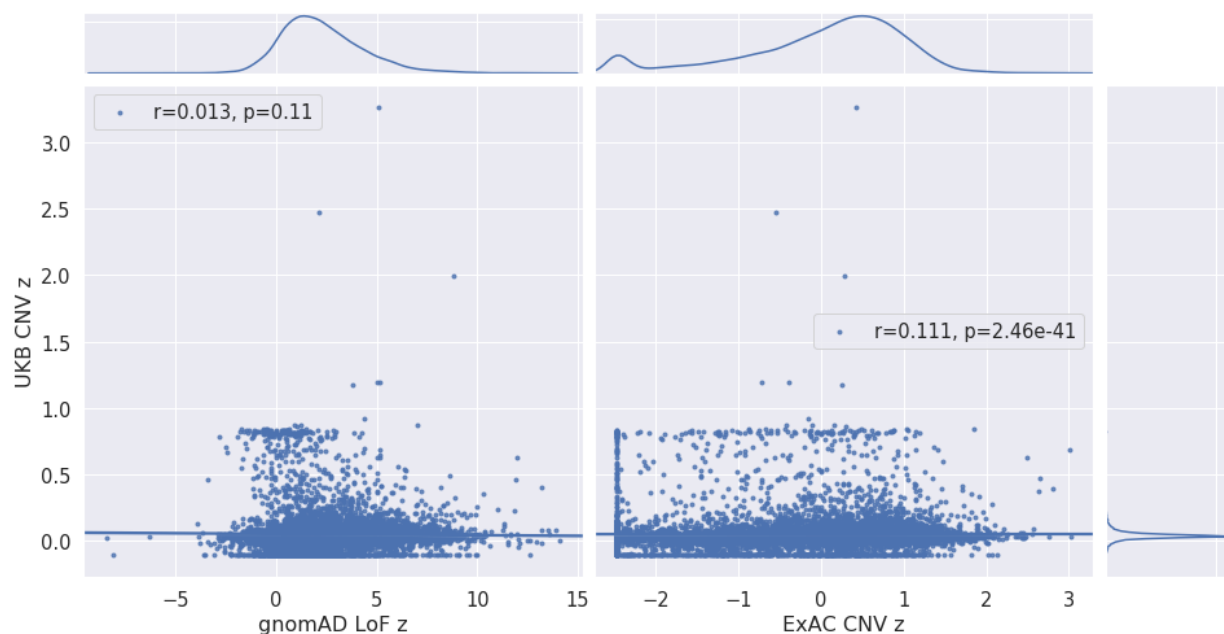

402

**Figure S4: Distribution of constraint z-scores from UK Biobank and ExAC/gnomAD.** Our measures of gene-level intolerance to structural variation show nominal correlation with gnomAD loss of function constraint z-scores (Spearman's  $r = 0.013$ , left), and modest correlation with CNV-intolerance in ExAC (Spearman's  $r = 0.11$ , right panel). Gaussian kernel density estimates for each distribution of z-scores are opposite their corresponding axes.

While correlation between constraint measures across datasets is non-random, we suspect cohort-specific effects and varying definitions of genic burden of variation drive these departures. As a cohort of predominantly healthy adults, intolerance to variation in UK Biobank constraint is driven by severe early onset disease, while the same measures in ExAC/gnomAD, whose samples have a more diverse age range and relatively higher of burden of disease, highlight genes involved with fundamental biological processes whose loss of function likely confer phenotypic consequences causing embryonic lethality.

403

404





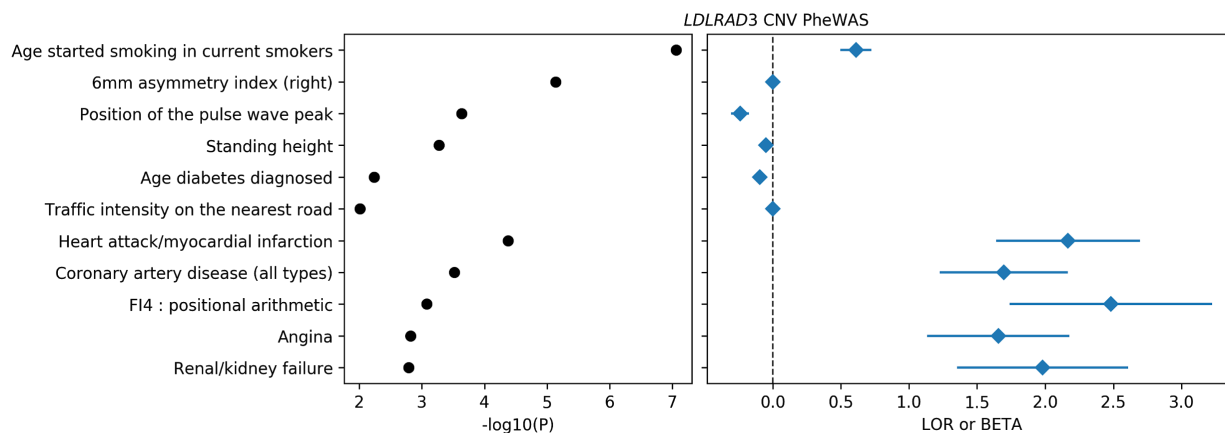

409

**Figure S6: *LDLRAD3* burden test PheWas.** Significant ( $p < 10^{-3}$ ) associations between regularized burden tests for *LDLRAD3* CNV and phenotypes. We highlight quantitative traits with  $n > 15,000$  observations and binary traits with  $n > 100$  cases. Traits are grouped by data type then sorted by  $p$ -value (left). Log-odds ratio and standardized betas (right; for binary and quantitative traits, respectively) align with trait names on the y-axis, with the horizontal dashed line separating positive and negative direction of association.

410

411

412

413

414 **Citations:**

- 415 1. Mikhail, F. M. Copy number variations and human genetic disease. *Curr. Opin. Pediatr.* **26**,  
416 646–652 (2014).
- 417 2. Carvill, G. L. & Mefford, H. C. Microdeletion syndromes. *Curr. Opin. Genet. Dev.* **23**, 232–  
418 239 (2013).
- 419 3. Bachmann-Gagescu, R. *et al.* Recurrent 200-kb deletions of 16p11.2 that include the  
420 SH2B1 gene are associated with developmental delay and obesity. *Genet. Med.* **12**, 641–  
421 647 (2010).
- 422 4. Zufferey, F. *et al.* A 600 kb deletion syndrome at 16p11.2 leads to energy imbalance and  
423 neuropsychiatric disorders. *J. Med. Genet.* **49**, 660–668 (2012).
- 424 5. McDonald-McGinn, D. M., Emanuel, B. S. & Zackai, E. H. 22q11.2 Deletion Syndrome. in  
425 *GeneReviews* (eds. Adam, M. P. *et al.*) (University of Washington, Seattle, 1999).
- 426 6. Raychaudhuri, S. *et al.* Accurately assessing the risk of schizophrenia conferred by rare  
427 copy-number variation affecting genes with brain function. *PLoS Genet.* **6**, e1001097  
428 (2010).
- 429 7. Priest, J. R. *et al.* De Novo and Rare Variants at Multiple Loci Support the Oligogenic  
430 Origins of Atrioventricular Septal Heart Defects. *PLoS Genet.* **12**, e1005963 (2016).
- 431 8. Ruderfer, D. M. *et al.* Patterns of genic intolerance of rare copy number variation in 59,898  
432 human exomes. *Nat. Genet.* **48**, 1107–1111 (2016).
- 433 9. Kirov, G. *et al.* The Uk Biobank: A Resource For Cnv Analysis. *Eur.*  
434 *Neuropsychopharmacol.* **27**, S491 (2017).
- 435 10. Crawford, K. *et al.* Medical consequences of pathogenic CNVs in adults: analysis of the UK  
436 Biobank. *J. Med. Genet.* (2018). doi:10.1136/jmedgenet-2018-105477
- 437 11. Owen, D. *et al.* Effects of pathogenic CNVs on physical traits in participants of the UK  
438 Biobank. *BMC Genomics* **19**, 867 (2018).
- 439 12. Kendall, K. M. *et al.* Cognitive Performance Among Carriers of Pathogenic Copy Number

- 440 Variants: Analysis of 152,000 UK Biobank Subjects. *Biol. Psychiatry* **82**, 103–110 (2017).
- 441 13. Bycroft, C. *et al.* The UK Biobank resource with deep phenotyping and genomic data.  
442 *Nature* **562**, 203–209 (2018).
- 443 14. McInnes, G. *et al.* Global Biobank Engine: enabling genotype-phenotype browsing for  
444 biobank summary statistics. *Bioinformatics* (2018). doi:10.1093/bioinformatics/bty999
- 445 15. Wang, K. *et al.* PennCNV: An integrated hidden Markov model designed for high-resolution  
446 copy number variation detection in whole-genome SNP genotyping data. *Genome Res.* **17**,  
447 1665–1674 (2007).
- 448 16. Jordan, V. K., Zaveri, H. P. & Scott, D. A. 1p36 deletion syndrome: an update. *Appl. Clin.*  
449 *Genet.* **8**, 189–200 (2015).
- 450 17. Akbaroghli, S., Tonekaboni, S. H., Kariminejad, R., Liehr, T. & Coci, E. G. De-novo  
451 interstitial 2.33 Mb deletion in 8q24.3: new insights on a very rare partial monosomy  
452 syndrome. *Clin. Dysmorphol.* **27**, 97–100 (2018).
- 453 18. Iwakoshi, M. *et al.* 9q34.3 deletion syndrome in three unrelated children. *Am. J. Med.*  
454 *Genet. A* **126A**, 278–283 (2004).
- 455 19. Cario, H., Bode, H., Gustavsson, P., Dahl, N. & Kohne, E. A microdeletion syndrome due to  
456 a 3-Mb deletion on 19q13.2--Diamond-Blackfan anemia associated with macrocephaly,  
457 hypotonia, and psychomotor retardation. *Clin. Genet.* **55**, 487–492 (1999).
- 458 20. Fry, A. *et al.* Comparison of Sociodemographic and Health-Related Characteristics of UK  
459 Biobank Participants With Those of the General Population. *Am. J. Epidemiol.* **186**, 1026–  
460 1034 (2017).
- 461 21. Hall, J. M. *et al.* Closing in on a breast cancer gene on chromosome 17q. *Am. J. Hum.*  
462 *Genet.* **50**, 1235–1242 (1992).
- 463 22. Wooster, R. *et al.* Identification of the breast cancer susceptibility gene BRCA2. *Nature*  
464 **378**, 789–792 (1995).
- 465 23. Papadopoulos, N. *et al.* Mutation of a mutL homolog in hereditary colon cancer. *Science*

- 466           **263**, 1625–1629 (1994).
- 467   24. Papadopoulos, N. *et al.* Mutations of GTBP in genetically unstable cells. *Science* **268**,
- 468           1915–1917 (1995).
- 469   25. Fishel, R. *et al.* The human mutator gene homolog MSH2 and its association with
- 470           hereditary nonpolyposis colon cancer. *Cell* **75**, 1027–1038 (1993).
- 471   26. Savitsky, K. *et al.* A single ataxia telangiectasia gene with a product similar to PI-3 kinase.
- 472           *Science* **268**, 1749–1753 (1995).
- 473   27. Horii, A. *et al.* The APC gene, responsible for familial adenomatous polyposis, is mutated in
- 474           human gastric cancer. *Cancer Res.* **52**, 3231–3233 (1992).
- 475   28. Gene Ontology Consortium & Gene Ontology Consortium. The Gene Ontology (GO)
- 476           database and informatics resource. *Nucleic Acids Res.* **32**, 258D–261 (2004).
- 477   29. Chang, C. C. *et al.* Second-generation PLINK: rising to the challenge of larger and richer
- 478           datasets. *Gigascience* **4**, 7 (2015).
- 479   30. Povey, S. *et al.* The HUGO Gene Nomenclature Committee (HGNC). *Hum. Genet.* **109**,
- 480           678–680 (2001).
- 481   31. Astle, W. J. *et al.* The Allelic Landscape of Human Blood Cell Trait Variation and Links to
- 482           Common Complex Disease. *Cell* **167**, 1415–1429.e19 (2016).
- 483   32. Pott, J. *et al.* Genome-wide meta-analysis identifies novel loci of plaque burden in carotid
- 484           artery. *Atherosclerosis* **259**, 32–40 (2017).
- 485   33. van der Harst, P. & Verweij, N. Identification of 64 Novel Genetic Loci Provides an
- 486           Expanded View on the Genetic Architecture of Coronary Artery Disease. *Circ. Res.* **122**,
- 487           433–443 (2018).
- 488   34. Ranganathan, S. *et al.* LRAD3, a novel low-density lipoprotein receptor family member that
- 489           modulates amyloid precursor protein trafficking. *J. Neurosci.* **31**, 10836–10846 (2011).
- 490   35. Noyes, N. C., Hampton, B., Migliorini, M. & Strickland, D. K. Regulation of Itch and Nedd4
- 491           E3 Ligase Activity and Degradation by LRAD3. *Biochemistry* **55**, 1204–1213 (2016).



- 492 36. Hemani, G. *et al.* The MR-Base platform supports systematic causal inference across the  
493 human phenome. *Elife* **7**, (2018).
- 494 37. Nikpay, M. *et al.* A comprehensive 1,000 Genomes-based genome-wide association meta-  
495 analysis of coronary artery disease. *Nat. Genet.* **47**, 1121–1130 (2015).
- 496 38. Pruim, R. J. *et al.* LocusZoom: regional visualization of genome-wide association scan  
497 results. *Bioinformatics* **26**, 2336–2337 (2010).
- 498 39. International HapMap Consortium. The International HapMap Project. *Nature* **426**, 789–796  
499 (2003).
- 500 40. Qiu, Y. *et al.* Oligogenic Effects of 16p11.2 Copy Number Variation on Craniofacial  
501 Development. (2019).
- 502 41. Wojciechowski, P. *et al.* Impact of FTO genotypes on BMI and weight in polycystic ovary  
503 syndrome: a systematic review and meta-analysis. *Diabetologia* **55**, 2636–2645 (2012).
- 504 42. Voll, S. L. *et al.* Obesity in adults with 22q11.2 deletion syndrome. *Genet. Med.* **19**, 204–  
505 208 (2017).
- 506 43. Medina-Gomez, C. *et al.* Life-Course Genome-wide Association Study Meta-analysis of  
507 Total Body BMD and Assessment of Age-Specific Effects. *Am. J. Hum. Genet.* **102**, 88–102  
508 (2018).
- 509 44. Olsen, L. *et al.* Prevalence of rearrangements in the 22q11.2 region and population-based  
510 risk of neuropsychiatric and developmental disorders in a Danish population: a case-cohort  
511 study. *Lancet Psychiatry* **5**, 573–580 (2018).
- 512 45. Klaassen, P. *et al.* Explaining the variable penetrance of CNVs: Parental intelligence  
513 modulates expression of intellectual impairment caused by the 22q11.2 deletion. *Am. J.*  
514 *Med. Genet. B Neuropsychiatr. Genet.* **171**, 790–796 (2016).
- 515 46. Castel, S. E. *et al.* Modified penetrance of coding variants by cis-regulatory variation  
516 contributes to disease risk. *Nat. Genet.* **50**, 1327–1334 (2018).
- 517 47. Wang, N. K. & Chiang, J. P. W. Increasing evidence of combinatory variant effects calls for

- 518 revised classification of low-penetrance alleles. *Genet. Med.* (2018). doi:10.1038/s41436-  
519 018-0347-3
- 520 48. DeBoever, C. *et al.* Medical relevance of protein-truncating variants across 337,205  
521 individuals in the UK Biobank study. *Nat. Commun.* **9**, 1612 (2018).
- 522 49. Howrigan, D. P. *et al.* Genome-wide autozygosity is associated with lower general cognitive  
523 ability. *Mol. Psychiatry* **21**, 837–843 (2016).
- 524 50. Purcell, S. *et al.* PLINK: a tool set for whole-genome association and population-based  
525 linkage analyses. *Am. J. Hum. Genet.* **81**, 559–575 (2007).
- 526 51. Diskin, S. J. *et al.* Adjustment of genomic waves in signal intensities from whole-genome  
527 SNP genotyping platforms. *Nucleic Acids Res.* **36**, e126 (2008).
- 528 52. Bailey, J. A., Yavor, A. M., Massa, H. F., Trask, B. J. & Eichler, E. E. Segmental  
529 duplications: organization and impact within the current human genome project assembly.  
530 *Genome Res.* **11**, 1005–1017 (2001).
- 531 53. Haeussler, M. *et al.* The UCSC Genome Browser database: 2019 update. *Nucleic Acids*  
532 *Res.* **47**, D853–D858 (2019).
